# Supplementary material for: Is Experience the Best Teacher? Knowledge, Perceptions, and Awareness of Wildfire Risk
Source: MDPI journal article supplement (doi:10.3390/ijerph18168385), 2021-08-08
Supplement: s1 [file s1]

## Supplementary Material

Survey questionnaire (English translation)

### **“Knowledge, Perception, and awareness of wildfire risk”**

Date.....

#### **A. ABOUT YOU**

1. Age: \_\_ years old
2. Gender:
  - ☐ Male
  - ☐ Female
  - ☐ Third Gender
3. Education level:
  - ☐ No education
  - ☐ Primary school
  - ☐ Secondary school
  - ☐ High school
  - ☐ University or higher
4. Occupation:
  - ☐ Unemployed
  - ☐ Student
  - ☐ Tradesman
  - ☐ Employee
  - ☐ Freelancer
  - ☐ Retired
  - ☐ If other, please specify: \_\_\_\_\_
5. Nationality: \_\_\_\_\_
6. City of residence: \_\_\_\_\_
7. Do you work or volunteer for organizations or associations (e.g., universities, civil protection, fire fighters) that are connected or that deal with fires?
  - ☐ Yes
  - ☐ No
8. If yes, please specify which: \_\_\_\_\_
9. In which area of your municipality do you live?
  - ☐ Urban, peri-urban, or rural area
  - ☐ Forest area
10. If you have a second home, in which area of the municipality is it located?
  - ☐ Urban, peri-urban, or rural area
  - ☐ Forest area
11. Have you ever experienced a forest fire firsthand?
  - ☐ Yes
  - ☐ No

## B. SUBJECTIVE KNOWLEDGE

12. How do you define a “wildfire”?

- ☐ As burning of the stubble, straw, and vegetation present at the end of the production cycles of natural meadows or arable land
- ☐ As the combustion of artifacts, infrastructures, and buildings in the vicinity of wooded areas
- ☐ As a fire capable of spreading over wooded, bushy, or arable land

13. How do you rate your knowledge about wildfires?

- ☐ No or little knowledge
- ☐ Moderate knowledge
- ☐ High knowledge

14. How do you define a “Wildland-Urban Interface”?

- ☐ A graphical interface that allows you to manage and map urban and forest areas
- ☐ Areas where homes and infrastructures meet and mix with wooded or natural areas
- ☐ Areas where housing and infrastructure meet and mix with rural or agricultural areas

15. How often do wildfires occur in your region?

- ☐ Never
- ☐ At least once a year

## C. ADVANCED KNOWLEDGE

16. Do you think that housing located in forest areas are protected from wildfires?

- ☐ Yes
- ☐ No

17. Please select which vegetation seems to you the most flammable (select the corresponding letter):

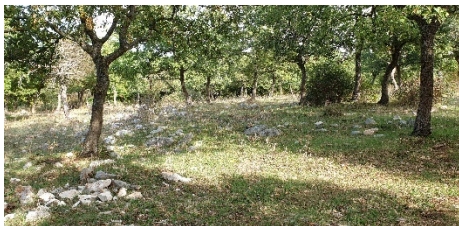

(a)

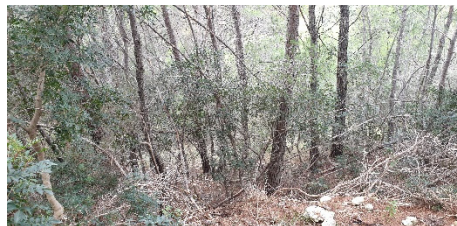

(b)

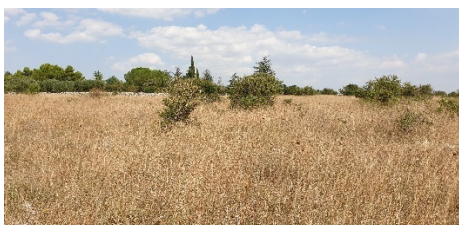

(c)

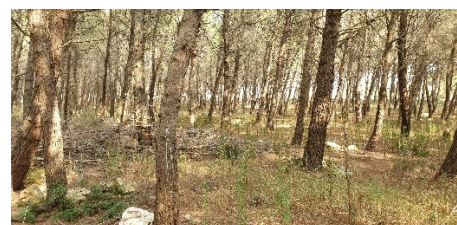

(d)

18. Do you think climate change can affect wildfire risk?

- ☐ Yes
- ☐ No

19. Do you think the wildfire risk in your region may increase?

- ☐ Yes
- ☐ No

#### **D. AWARENESS OF LEVEL OF INFORMATION**

20. Do you think that sufficient measures have been applied to mitigate the wildfire risk in your region?

- ☐ Yes
- ☐ No

21. Do you look for information about wildfires?

- ☐ Never
- ☐ Rarely
- ☐ Sometimes
- ☐ Often
- ☐ Always

#### **E. SELF-PROTECTION MEASURES**

Please, assume you are in a wildfire risk area...

22. ...what would you do?

- ☐ I would counter the threat
- ☐ I would avoid the threat

23. ...would you equip your home with fire protection systems?

- ☐ Yes
- ☐ No

#### **F. COMMUNITY INVOLVEMENT**

24. Do you think that scientific research is essential to improve people's level of awareness of wildfire risk?

- ☐ Not at all
- ☐ A little
- ☐ Neutral
- ☐ Somewhat
- ☐ Very much

25. Do you think that a more informed and prepared community is an important condition for the prevention and mitigation of wildfire risk?

- ☐ Yes
- ☐ No
